# Supplementary material
Source: publisher figshare collection journal article supplement (https://sage.figshare.com/ndownloader/files/17282534)
Supplement: Supplementary file 1 [file 17282534]

## Appendix A. Explanations of Measures

Table A1. Items Included in the Independent Variables

| Variable                                                                   | Items                                                                                                                                                                                                                                                                                                                                                                                           |
|----------------------------------------------------------------------------|-------------------------------------------------------------------------------------------------------------------------------------------------------------------------------------------------------------------------------------------------------------------------------------------------------------------------------------------------------------------------------------------------|
| Bullying Victimization                                                     | (1) Being severely teased or bantered during the last one year<br>(2) Being threatened during the last one year<br>(3) Being collectively bullied during the last one year                                                                                                                                                                                                                      |
| Risk Factor Index Variables                                                |                                                                                                                                                                                                                                                                                                                                                                                                 |
| Parental Attachment<br>(Cronbach's $\alpha$ : .775-.814)                   | (1) My parents and I try to spend much time together<br>(2) My parents always treat me with love and affection<br>(3) My parents and I understand each other well                                                                                                                                                                                                                               |
| Parental Monitoring<br>(Cronbach's $\alpha$ : .850-.894)                   | (1) When I go out, my parents usually know where I am<br>(2) When I go out, my parents usually know whom I am with<br>(3) When I go out, my parents usually know what I am doing<br>(4) When I go out, my parents usually know when I return                                                                                                                                                    |
| Teacher Attachment<br>(Cronbach's $\alpha$ : .704-.799)                    | (1) I can talk about all my troubles and worries to my teachers without reservation<br>(2) Teachers treat me with love and affection<br>(3) I hope to become a person just like my teacher                                                                                                                                                                                                      |
| Negative Emotionality/Low Constraints<br>(Cronbach's $\alpha$ : .651-.690) | (1) I jump into exciting things even if I have to take an examination tomorrow<br>(2) I abandon a task once it becomes hard and laborious to do<br>(3) I am apt to enjoy risky activities<br>(4) I enjoy teasing and harassing other people<br>(5) I lose my temper whenever I get angry<br>(5) I don't do my homework habitually                                                               |
| Delinquent Peer Associations<br>(Cronbach's $\alpha$ : .687-.897)          | (1) Among your close friends, how many drank during the last one year?<br>(2) Among your close friends, how many smoked during the last one year?<br>(3) Among your close friends, how many severely beat others during the last one year?<br>(4) Among your close friends, how many robbed during the last one year?<br>(5) Among your close friends, how many stole during the last one year? |
| Low Self-Esteem<br>(Cronbach's $\alpha$ : .752-.791)                       | (1) Sometimes I think that I am a worthless person<br>(2) Sometimes I think that I am a bad person<br>(3) I generally feel that I am a failure in life                                                                                                                                                                                                                                          |
| Problem-Solving Ability<br>(Cronbach's $\alpha$ : .825-.870)               | (1) I have confidence in my own decision<br>(2) I believe that I can deal with my problems by myself                                                                                                                                                                                                                                                                                            |

Control Variables

Criminal Victimization

- (1) Being severely beaten during the last one year
- (2) Being sexually assaulted/harassed during the last one year
- (3) Being robbed/extorted for money during the last one year

School-Related Strain

(Cronbach's  $\alpha$ : .749-.796)

- (1) I get stressed by poor school grades
- (2) I get stressed by home assignments or examinations
- (3) I get stressed because it is boring to study

Parental Strain

(Cronbach's  $\alpha$ : .862-.893)

- (1) I get stressed by disputes with my parents
- (2) I get stressed by my parents' meddling into my life
- (3) I get stressed by communication difficulty with my parents

Parental Abuse

(Cronbach's  $\alpha$ : .756-.840)

- (1) I am often verbally abused by parents
- (2) I am often severely beaten by parents

Self-Strain

(Cronbach's  $\alpha$ : .720-.767)

- (1) I get stressed by weight issue
- (2) I get stressed by height issue
- (3) I get stressed by dissatisfaction over my appearance

Finance Strain

(Cronbach's  $\alpha$ : .823-.862)

- (1) I get stressed by inability to wear stylish clothes
- (2) I get stressed by lack of pocket money
- (3) I get stressed by inability to get goods that I want

Anger

(Cronbach's  $\alpha$ : .727-.788)

- (1) I fight more frequently than others do
  - (2) I am often seized by an impulse to throw an object whenever I get angry
  - (3) Sometimes I can't suppress an impulse to hit other people
  - (4) I consider myself as an explosive soon to be blown off
  - (3) I am taking full responsibility of my own life
-

Table A2. Descriptive Statistics by Wave

| Variables                            | Wave 1 |       | Wave 2 |       | Wave 3 |       | Wave 4 |       | Wave 5 |       |
|--------------------------------------|--------|-------|--------|-------|--------|-------|--------|-------|--------|-------|
|                                      | Mean   | SD    |
| Delinquency                          |        |       |        |       |        |       |        |       |        |       |
| Overall Delinquency                  | 1.111  | 1.618 | .731   | 1.359 | .707   | 1.177 | .778   | 1.132 | .886   | 1.123 |
| Substance Use (smoking and drinking) | .430   | .667  | .386   | .637  | .473   | .661  | .578   | .693  | .675   | .699  |
| Analogous Behaviors                  | .092   | .350  | .100   | .374  | .091   | .356  | .097   | .368  | .133   | .412  |
| Violence and Theft                   | .263   | .644  | .129   | .479  | .070   | .343  | .053   | .275  | .038   | .237  |
| Bullying Perpetration                | .326   | .635  | .116   | .422  | .073   | .331  | .050   | .264  | .039   | .247  |
| Bullying Victimization               |        |       |        |       |        |       |        |       |        |       |
| Bullying Victimization (dummy)       | .142   | .349  | .070   | .255  | .032   | .177  | .024   | .152  | .016   | .127  |
| Bullying Duration                    | .000   | .000  | .031   | .173  | .016   | .162  | .013   | .164  | .005   | .109  |
| Time-Varying Controls                |        |       |        |       |        |       |        |       |        |       |
| Criminal Victimization (dummy)       | .127   | .333  | .063   | .243  | .021   | .142  | .015   | .121  | .007   | .081  |
| School-Related Strain                | .000   | .812  | .005   | .834  | .009   | .837  | .014   | .833  | .013   | .835  |
| Parents Strain                       | -.003  | .887  | -.003  | .902  | -.004  | .882  | -.005  | .890  | .001   | .890  |
| Parental Abuse                       | -.012  | .888  | -.012  | .920  | -.013  | .896  | -.005  | .924  | -.004  | .921  |
| Self-Strain                          | .002   | .806  | .001   | .821  | -.001  | .800  | -.002  | .806  | .003   | .811  |
| Finance Strain                       | .002   | .853  | -.004  | .875  | -.002  | .880  | -.005  | .883  | .002   | .878  |
| Anger                                | -.006  | .733  | -.003  | .761  | -.005  | .753  | -.008  | .768  | -.004  | .780  |
| Risk Factor Index                    | 1.980  | 1.578 | 1.979  | 1.470 | 1.968  | 1.482 | 1.994  | 1.529 | 1.972  | 1.520 |
| Age                                  | 13.785 | .417  | 14.785 | .417  | 15.788 | .413  | 16.784 | .415  | 17.781 | .417  |
| Time-Stable Control                  |        |       |        |       |        |       |        |       |        |       |
| Male                                 | .502   | .500  | .498   | .500  | .501   | .500  | .501   | .500  | .509   | .500  |
| n(individuals)                       | 3,312  |       | 3,084  |       | 3,015  |       | 3,023  |       | 2,863  |       |

*Note:* Negative means are a result of standardizing indices.

*Abbreviations:* SD = standard deviation
